# Supplementary material for: Identification of the Microbiota in Coconut Water, Kefir, Coconut Water Kefir and Coconut Water Kefir-Fermented Sourdough Using Culture-Dependent Techniques and Illumina–MiSeq Sequencing
Source: MDPI journal article supplement (doi:10.3390/microorganisms12050919), 2024-04-30
Supplement: s1 [file s1]

**Table S1.** Results of cell and colony morphology, physiological and biochemical tests performed on LAB isolates. Isolates identified from multiple sources such as kefir (K), CWK and/or CWK-fermented sourdough (CWKS) have been labelled accordingly.

| Test                                                                 | Isolate 1<br>(Source-K,<br>CWK, CWKS) | Isolate 2<br>(Source-K,<br>CWK, CWKS) | Isolate 3<br>(Source-K,<br>CWK, CWKS) | Isolate 4<br>(Source-K,<br>CWK, CWKS) | Isolate 5<br>(Source-K,<br>CWK, CWKS) | Isolate 6<br>(Source-K,<br>CWK, CWKS) | Isolate 7<br>(Source-K,<br>CWK, CWKS) | Isolate 8<br>(Source-K,<br>CWK, CWKS) | Isolate 9<br>(Source-K,<br>CWK, CWKS) | Isolate 10<br>(Source-K,<br>CWK, CWKS) |
|----------------------------------------------------------------------|---------------------------------------|---------------------------------------|---------------------------------------|---------------------------------------|---------------------------------------|---------------------------------------|---------------------------------------|---------------------------------------|---------------------------------------|----------------------------------------|
| Colony colour                                                        | Transparent                            |
| Surface appearance                                                   | Smooth/moist                           |
| Cell morphology                                                      | Bacilli                                |
| Gram reaction                                                        | +                                     | +                                     | +                                     | +                                     | +                                     | +                                     | +                                     | +                                     | +                                     | +                                      |
| Catalase test                                                        | –                                     | –                                     | –                                     | –                                     | –                                     | –                                     | –                                     | –                                     | –                                     | –                                      |
| Spore formation                                                      | –                                     | –                                     | –                                     | –                                     | –                                     | –                                     | –                                     | –                                     | –                                     | –                                      |
| Nitrate reduction test                                               | –                                     | –                                     | –                                     | –                                     | –                                     | –                                     | –                                     | –                                     | –                                     | –                                      |
| Indole test                                                          | –                                     | –                                     | –                                     | –                                     | –                                     | –                                     | –                                     | –                                     | –                                     | –                                      |
| 6.5% NaCl growth test                                                | –                                     | –                                     | –                                     | +                                     | +                                     | +                                     | +                                     | +                                     | +                                     | +                                      |
| 10% NaCl growth test                                                 | –                                     | –                                     | –                                     | –                                     | –                                     | –                                     | –                                     | –                                     | –                                     | –                                      |
| 4 °C growth test                                                     | –                                     | –                                     | –                                     | –                                     | –                                     | –                                     | –                                     | –                                     | –                                     | –                                      |
| 15 °C growth test                                                    | +                                     | +                                     | +                                     | +                                     | +                                     | +                                     | +                                     | +                                     | +                                     | +                                      |
| 45 °C growth test                                                    | –                                     | –                                     | –                                     | –                                     | –                                     | –                                     | –                                     | –                                     | –                                     | –                                      |
| Growth at pH 3                                                       | –                                     | –                                     | –                                     | –                                     | –                                     | –                                     | –                                     | –                                     | –                                     | –                                      |
| Growth at pH 4                                                       | –                                     | –                                     | –                                     | –                                     | –                                     | –                                     | –                                     | –                                     | –                                     | –                                      |
| Growth at pH 5                                                       | –                                     | –                                     | –                                     | –                                     | –                                     | –                                     | –                                     | –                                     | –                                     | –                                      |
| 0.1% Bile salt                                                       | +                                     | +                                     | +                                     | +                                     | +                                     | +                                     | +                                     | +                                     | +                                     | +                                      |
| 0.9% Bile salts                                                      | +                                     | +                                     | +                                     | +                                     | +                                     | +                                     | +                                     | +                                     | +                                     | +                                      |
| 1.5% bile salts                                                      | +                                     | +                                     | +                                     | +                                     | +                                     | +                                     | +                                     | +                                     | +                                     | +                                      |
| 2% bile salts                                                        | +                                     | +                                     | +                                     | +                                     | +                                     | +                                     | +                                     | +                                     | +                                     | +                                      |
| Gas production<br>during glucose<br>fermentation in a<br>Durham tube | +                                     | +                                     | +                                     | +                                     | +                                     | +                                     | +                                     | +                                     | +                                     | +                                      |
| Glycerol                                                             | –                                     | –                                     | –                                     | +                                     | +                                     | +                                     | –                                     | –                                     | –                                     | –                                      |
| D-Ribose                                                             | –                                     | –                                     | –                                     | +                                     | +                                     | +                                     | +                                     | +                                     | +                                     | –                                      |
| D-xylose                                                             | +                                     | +                                     | +                                     | –                                     | –                                     | –                                     | –                                     | –                                     | –                                     | –                                      |

|                      |                                               |                                               |                                               |                                         |                                         |                                         |                                      |                                      |                                      |                                      |
|----------------------|-----------------------------------------------|-----------------------------------------------|-----------------------------------------------|-----------------------------------------|-----------------------------------------|-----------------------------------------|--------------------------------------|--------------------------------------|--------------------------------------|--------------------------------------|
| D-Galactose          | +                                             | +                                             | +                                             | +                                       | +                                       | +                                       | +                                    | +                                    | +                                    | +                                    |
| D-Glucose            | +                                             | +                                             | +                                             | +                                       | +                                       | +                                       | +                                    | +                                    | +                                    | +                                    |
| D-Fructose           | +                                             | +                                             | +                                             | +                                       | +                                       | +                                       | +                                    | –                                    | –                                    | +                                    |
| D-Mannose            | +                                             | +                                             | +                                             | +                                       | +                                       | +                                       | +                                    | –                                    | –                                    | –                                    |
| Mannitol             | –                                             | –                                             | –                                             | +                                       | +                                       | +                                       | +                                    | +                                    | +                                    | +                                    |
| Sorbitol             | –                                             | –                                             | –                                             | +                                       | +                                       | +                                       | –                                    | –                                    | –                                    | –                                    |
| N-acetyl-glucosamine | –                                             | –                                             | –                                             | +                                       | +                                       | +                                       | +                                    | –                                    | –                                    | –                                    |
| Amygdalin            | –                                             | –                                             | –                                             | –                                       | –                                       | –                                       | –                                    | +                                    | +                                    | –                                    |
| Arbutin              | –                                             | –                                             | –                                             | +                                       | +                                       | +                                       | –                                    | +                                    | +                                    | –                                    |
| Esculin              | –                                             | –                                             | –                                             | +                                       | +                                       | +                                       | –                                    | +                                    | +                                    | –                                    |
| Salicin              | –                                             | –                                             | –                                             | +                                       | +                                       | +                                       | +                                    | –                                    | –                                    | –                                    |
| Cellobiose           | –                                             | –                                             | –                                             | +                                       | +                                       | +                                       | –                                    | –                                    | –                                    | –                                    |
| Maltose              | +                                             | +                                             | +                                             | +                                       | +                                       | +                                       | +                                    | +                                    | +                                    | –                                    |
| Lactose              | +                                             | +                                             | +                                             | +                                       | +                                       | +                                       | –                                    | +                                    | +                                    | –                                    |
| Melibiose            | +                                             | +                                             | +                                             | +                                       | +                                       | +                                       | –                                    | +                                    | +                                    | +                                    |
| Sucrose              | +                                             | +                                             | +                                             | +                                       | +                                       | +                                       | +                                    | +                                    | +                                    | +                                    |
| Trehalose            | –                                             | –                                             | –                                             | +                                       | +                                       | +                                       | +                                    | –                                    | –                                    | +                                    |
| Melezitose           | –                                             | –                                             | –                                             | –                                       | –                                       | –                                       | –                                    | –                                    | –                                    | –                                    |
| D-Raffinose          | –                                             | –                                             | –                                             | +                                       | +                                       | +                                       | –                                    | +                                    | +                                    | –                                    |
| Starch               | +                                             | +                                             | +                                             | –                                       | –                                       | –                                       | –                                    | –                                    | –                                    | –                                    |
| Glycogen             | +                                             | +                                             | +                                             | –                                       | –                                       | –                                       | –                                    | –                                    | –                                    | –                                    |
| D-Gentiobiose        | –                                             | –                                             | –                                             | +                                       | +                                       | +                                       | –                                    | –                                    | –                                    | –                                    |
| D-Turanose           | –                                             | –                                             | –                                             | +                                       | +                                       | +                                       | –                                    | –                                    | –                                    | –                                    |
| D-Lyxose             | –                                             | –                                             | –                                             | –                                       | –                                       | –                                       | –                                    | –                                    | –                                    | –                                    |
| D-Tagatose           | –                                             | –                                             | –                                             | +                                       | +                                       | +                                       | –                                    | –                                    | –                                    | –                                    |
| D-Arabitol           | –                                             | –                                             | –                                             | +                                       | +                                       | +                                       | –                                    | –                                    | –                                    | –                                    |
| Gluconate            | +                                             | +                                             | +                                             | +                                       | +                                       | +                                       | –                                    | –                                    | –                                    | +                                    |
| Fermentation         | Obligately<br>Heterofermen<br>tative          | Obligately<br>Heterofermen<br>tative          | Obligately<br>Heterofermen<br>tative          | Facultatively<br>Heterofermen<br>tative | Facultatively<br>Heterofermen<br>tative | Facultatively<br>Heterofermen<br>tative | Obligately<br>Heterofermen<br>tative | Obligately<br>Heterofermen<br>tative | Obligately<br>Heterofermen<br>tative | Obligately<br>Heterofermen<br>tative |
| Isolate identified   | <i>Limosilactoba<br/>cillus<br/>fermentum</i> | <i>Limosilactoba<br/>cillus<br/>fermentum</i> | <i>Limosilactoba<br/>cillus<br/>fermentum</i> | <i>Lactobacillus<br/>plantarum</i>      | <i>Lactobacillus<br/>plantarum</i>      | <i>Lactobacillus<br/>plantarum</i>      | <i>Lactobacillus<br/>fusant</i>      | <i>Lactobacillus<br/>reuteri</i>     | <i>Lactobacillus<br/>reuteri</i>     | <i>Lactobacillus<br/>kunkeei</i>     |

**Table S2.** Results of cell and colony morphological, physiological and biochemical tests performed on AAB isolates. Isolates identified from multiple sources such as kefir (K), CWK and/or CWK-fermented sourdough (CWKS) have been labelled accordingly.

| Tests                    | <i>Isolate 1 (Source—K, CWK, CWKS)</i> | <i>Isolate 2 (Source- K, CWK, CWKS)</i> | <i>Isolate 3 (Source -K, CWK, CWKS)</i> | <i>Isolate 4 (Source- K, CWK, CWKS)</i> | <i>Isolate 5 (Source-K, CWK, CWKS)</i> |
|--------------------------|----------------------------------------|-----------------------------------------|-----------------------------------------|-----------------------------------------|----------------------------------------|
| Colony colour            | White and opaque                       | White and opaque                        | White and opaque                        | White and opaque                        | Cream colour and opaque                |
| Surface appearance       | Smooth                                 | Smooth                                  | Smooth                                  | Smooth                                  | Smooth                                 |
| Cell morphology          | Bacilli or oblong                      | Bacilli or oblong                       | Bacilli or oblong                       | Bacilli or oblong                       | Oblong                                 |
| Gram reaction test       | –                                      | –                                       | –                                       | –                                       | –                                      |
| Catalase test            | +                                      | +                                       | +                                       | +                                       | +                                      |
| Oxidation of ethanol     | +                                      | +                                       | –                                       | –                                       | –                                      |
| Oxidation of acetic acid | –                                      | –                                       | –                                       | –                                       | –                                      |
| Methyl red test          | –                                      | –                                       | –                                       | –                                       | –                                      |
| Voges–Proskauer test     | –                                      | –                                       | –                                       | –                                       | –                                      |
| 30% glucose growth test  | –                                      | –                                       | –                                       | –                                       | –                                      |
| arginine dihydrolase     | –                                      | –                                       | –                                       | –                                       | +                                      |
| Lysine                   | –                                      | –                                       | –                                       | –                                       | –                                      |
| Ornithine decarboxylase  | –                                      | –                                       | –                                       | –                                       | –                                      |
| Citrate Utilisation      | –                                      | –                                       | –                                       | –                                       | –                                      |
| Dihydrogen sulphide      | –                                      | –                                       | –                                       | –                                       | –                                      |
| Carr’s medium            | +                                      | +                                       | +                                       | +                                       | +                                      |
| Urease test              | –                                      | –                                       | –                                       | –                                       | +                                      |
| tryptophane deaminase    | –                                      | –                                       | –                                       | –                                       | –                                      |
| Indole test              | –                                      | –                                       | –                                       | –                                       | –                                      |
| Acetoin                  | –                                      | –                                       | –                                       | –                                       | +                                      |
| Fructose                 | +                                      | +                                       | +                                       | +                                       | +                                      |
| Ribose                   | +                                      | +                                       | +                                       | +                                       | +                                      |
| Xylose                   | +                                      | +                                       | +                                       | +                                       | +                                      |
| Galactose                | +                                      | +                                       | +                                       | +                                       | +                                      |
| Mannitol                 | –                                      | –                                       | –                                       | –                                       | –                                      |
| Raffinose                | –                                      | –                                       | –                                       | –                                       | –                                      |
| Inositol                 | –                                      | –                                       | –                                       | –                                       | –                                      |
| Sorbitol                 | –                                      | –                                       | –                                       | –                                       | –                                      |

|                    |                          |                          |                                |                                |                                 |
|--------------------|--------------------------|--------------------------|--------------------------------|--------------------------------|---------------------------------|
| Rhamnose           | +                        | +                        | –                              | –                              | –                               |
| Sucrose            | –                        | –                        | –                              | –                              | –                               |
| Melibiose          | +                        | +                        | +                              | +                              | –                               |
| Amygdalin          | +                        | +                        | +                              | +                              | –                               |
| Arabinose          | +                        | +                        | +                              | +                              | –                               |
| Nitrogen dioxide   | –                        | –                        | +                              | +                              | –                               |
| Nitrite            | –                        | –                        | +                              | +                              | –                               |
| Isolate identified | <i>Acetobacter aceti</i> | <i>Acetobacter aceti</i> | <i>Acetobacter lovaniensis</i> | <i>Acetobacter lovaniensis</i> | <i>Acetobacter pasteurianus</i> |

**Table S3.** Results of cell and colony morphology, physiological and biochemical tests performed on yeast isolates. Isolates identified from multiple sources such as kefir (K), CWK and/or CWK-fermented sourdough (CWKS), have been labelled accordingly.

| Test                                | Isolate 1 (Source- K, CWK, CWKS) | Isolate 2 (Source- K, CWK, CWKS) | Isolate 3 (Source- K, CWK, CWKS) | Isolate 4 (Source- K, CWK, CWKS) | Isolate 5 (Source- K, CWK, CWKS) | Isolate 6 (Source- K, CWK, CWKS) | Isolate 7 (Source- K, CWK, CWKS) |
|-------------------------------------|----------------------------------|----------------------------------|----------------------------------|----------------------------------|----------------------------------|----------------------------------|----------------------------------|
| Colony colour                       | Cream                            | Pink–red                         | Milky white                      | Milky white                      | Milky white                      | White                            | White                            |
| Surface appearance                  | Glossy and smooth                | Smooth and glossy                | Smooth                           | Smooth                           | Smooth                           | Smooth                           | Smooth                           |
| Cell morphology                     | Oval                             |
| Vegetative propagation              | Budding                          |
| Mycelium growth test                | Pseudohypha                      |
| Urease test                         | –                                | –                                | –                                | –                                | –                                | –                                | –                                |
| Nitrate reduction test              | –                                | –                                | –                                | –                                | –                                | –                                | –                                |
| D-Glucose as a carbon source        | +                                | +                                | +                                | +                                | +                                | +                                | +                                |
| Glycerol                            | +                                | –                                | –                                | –                                | –                                | +                                | +                                |
| Calcium 2-Keto-Gluconate            | –                                | –                                | –                                | –                                | –                                | +                                | –                                |
| L-Arabinose                         | –                                | –                                | –                                | –                                | –                                | +                                | –                                |
| D-Xylose as a carbon source         | +                                | –                                | –                                | –                                | –                                | +                                | –                                |
| Adonitol                            | –                                | +                                | –                                | –                                | –                                | +                                | –                                |
| Xylitol                             | +                                | +                                | –                                | –                                | –                                | +                                | –                                |
| D-Galactose as a carbon source      | +                                | +                                | +                                | +                                | +                                | +                                | –                                |
| Inositol                            | –                                | –                                | –                                | –                                | –                                | –                                | –                                |
| D-Sorbitol as a carbon source       | +                                | –                                | –                                | –                                | –                                | +                                | +                                |
| Methyl- $\alpha$ -D-Glucopyranoside | –                                | –                                | –                                | –                                | –                                | +                                | –                                |

|                                 |                      |                                 |                                 |                                 |                                 |                               |                            |
|---------------------------------|----------------------|---------------------------------|---------------------------------|---------------------------------|---------------------------------|-------------------------------|----------------------------|
| N-Acetyl-Glucosamine            | –                    | –                               | –                               | –                               | –                               | +                             | –                          |
| D-Cellobiose as a carbon source | +                    | –                               | –                               | –                               | –                               | +                             | –                          |
| D-Lactose as a carbon source    | +                    | –                               | –                               | –                               | –                               | –                             | –                          |
| D-Maltose as a carbon source    | –                    | +                               | +                               | +                               | +                               | +                             | –                          |
| D-Saccharose as a carbon source | +                    | +                               | +                               | +                               | +                               | +                             | +                          |
| D-Trehalose as a carbon source  | –                    | –                               | –                               | –                               | –                               | +                             | +                          |
| D-Melezitose as a carbon source | –                    | –                               | –                               | –                               | –                               | +                             | –                          |
| D-Raffinose as a carbon source  | +                    | +                               | +                               | +                               | +                               | +                             | +                          |
| Isolate identified              | <i>Candida kefyr</i> | <i>Rhodotorula mucilaginosa</i> | <i>Saccharomyces cerevisiae</i> | <i>Saccharomyces cerevisiae</i> | <i>Saccharomyces cerevisiae</i> | <i>Candida guilliermondii</i> | <i>Candida colliculosa</i> |

**Table S4.** Sanger sequencing of each isolate of the LAB and AAB species.

| Identified organisms (% identity match)                                                            | Accession number* | E-value* | Maximum score* |
|----------------------------------------------------------------------------------------------------|-------------------|----------|----------------|
| <i>Limosilactobacillus fermentum</i> strain CAU6479 16S ribosomal RNA gene, partial sequence (100) | MF582851.1        | 0.0      | 2619           |
| <i>Lactobacillus plantarum</i> strain RS66X 16S ribosomal RNA gene, partial sequence (100)         | MN450268.1        | 0.0      | 2536           |
| <i>Lactobacillus Fusant</i> XU1 16S ribosomal RNA gene, partial sequence (99)                      | KT335719.1        | 0.0      | 2687           |
| <i>Lactobacillus reuteri</i> DSM 20016, 16S ribosomal RNA gene, partial sequence (100)             | NR_119069.1       | 0.0      | 2883           |
| <i>Lactobacillus kunkeei</i> strain H14_2_1BCO2 16S ribosomal RNA gene, partial sequence (100)     | KF599421.1        | 0.0      | 2582           |
| <i>Acetobacter aceti</i> strain W1 16S ribosomal RNA gene, partial sequence (100)                  | KC662508.1        | 0.0      | 2676           |
| <i>Acetobacter lovaniensis</i> strain NBRC 13753 16S ribosomal RNA, partial sequence (100)         | NR_040832.1       | 0.0      | 2665           |
| <i>Acetobacter pasteurianus</i> strain bh12 16S ribosomal RNA gene, partial sequence (100)         | FJ227313.1        | 0.0      | 2326           |

The E-value\* determines the number of hits one can “expect” to see by chance when searching a database of a particular size, which in this case is 0. Therefore, this implies that there were no random hits in the identification of LAB and AAB species on NCBI BLAST. The accession number\* is the unique identification number on the NCBI BLAST database. The maximum score\* is the total score that has been identified as that particular microorganism, which is the highest alignment score of a set of aligned segments from the same subject (database) sequence. The percentage of identity was determined by performing multiple sequence alignments in BLAST.

**Supplementary File S1.** Sanger sequencing output: 16s rDNA partial sequences for LAB and AAB.

**LAB Isolate 1:** *Limosilactobacillus fermentum* strain CAU6479 16S ribosomal RNA gene.

5'ACTGATTGATGGTGTCTTGCACCTGATTGACGATGGATCAC  
CAGTGAGTGGCGGACGGGTAGTAACACGTAGGTAACCTGCCCC  
GGAGCGGGGATAACATTTGGAAACAGATGCTAATACCGCATA  
ACAACAAAAGCCACATGGCTTTTGTGGAAAGATGGCTTTGGC  
TATCACTCTGGGATGGACCTGCGGTGCATTAGCTAGTTGGTAAG  
GTAACGGCTTACCAAGGCGATGATGCATAGCCGAGTTGAGAGA  
CTGATCGGCCACAATGGAAGTACGACACGGTCCATACTCCTAC  
GGGAGGCAGCAGTAGGGAATCTTCCACAATGGGCGCAAGCCT  
GATGGAGCAACACCGCGTGAGTGAAGAAGGGTTTCGGCTCGT  
AAAGCTCTGTTGTTGGAGAAGAACGTGCGTGAGAGTAAGTGT  
CACGCAGTGACGGTATCCAACCAGAAAGTCACGGCTAACTACG  
TGCCAGCAGCCGCGGTAATACGTAGGTGGCAAGCGTTATCCGG  
ATTTATTGGGCGTAAAGCGAGCGCAGGCGGTTGCTTAGGTCTG  
ATGTGAAAGCCTTCGGCTTAACCGAAGAAGTGCATCGGAAACC  
GGGCGACTTGAGTGCAGAAGAGGACAGTGGAAGTCCATGTGT  
AGCGGTGGAATGCGTAGATATATGGAAGAACACAGTGGCGAA  
GGCGGCTGTCTGGTCTGCAACTGACGCTGAGGCTCGAAAGCAT  
GGGTAGCGAACAGGATTAGATACCCTGGTAGTCCATGCCGTAA  
ACGATGAGTGCTAGGTGTTGGAGGGTTTCCGCCCTTCAGTGCC  
GGAGCTAACGCATTAAGCACTCCGCCTGGGGAGTACGACCGCA

AGGTTGAAACTCAAAGGAATTGACGGGGGCCCCGCACAAGCGG  
TGGAGCATGTGGTTTAATTCTGAAGCTACGCGAAGAACCTTACC  
AGGTCCTTGACATCTTGCGCAACCTTAGAGATAAGGCGTTCCCTT  
CGGGGACGCAATGACAGGTGGTGCATGGTCGTCAGCTCGT  
GTCGTGAGATGTTGGGTAAAGTCCCGCAACGAGCGCAACCCTT  
GTTACTAGTTGCCAGCATTAAAGTTGGGCACTCTAGTGAGACTGC  
CGGTGACAAACCGGAGGAAGGTGGGGACGACGTCAGATCATC  
ATGCCCCCTTATGACCTGGGCTACACACGTGCTACAATGGACGGT  
ACAACGAGTCGCAAGCTCGCGAGAGTAAGCTAATCTCTTAAAG  
CCGTTCTCAGTTCGGACTGTAGGCTGCAACTCGCCTACACGAA  
GTCGGAATCGCTAGAATCGCGGATCAGCATGCCGCGGTGAATA  
CGTTCCCGGGCCTTGTACACACCGCCCGTCACACCATGGGAGT  
TTGTAACGCCCAAAGTCGGTGGCCTAACCATTAGGAGGGAGCC  
3'

**LAB Isolate 2: *Lactobacillus plantarum* strain RS66X 16S ribosomal RNA gene, partial sequence.**

5'TTACCCACCGACTTTGGGTGTTACAACTCTCATGGTGT  
GACGGGCGGTGTGTACAAGGCCCGGGAACGTATTCACGCGGC  
ATGCTGATCCGCGATTACTAGCGATTCCGACTTCATGTAGGCGA  
GTTGCAGCCTACAATCCGAAGTGAAGTGGCTTTAAGAGATTA  
GCTTACTCTCGCGAGTTCGCAACTCGTTGTACCATCCATTGTAG  
CACGTGTGTAGCCCAGGTCATAAGGGGCATGATGATTTGACGTC  
ATCCCCACCTTCCTCCGGTTTGTACCGGCAGTCTCACCAGAGT  
GCCCAACTTAATGCTGGCAACTGATAATAAGGGTTGCGCTCGTT  
GCGGGACTTAACCCAACATCTCACGACACGAGCTGACGACAA  
CCATGCACCACCTGTATCCATGTCCCCGAAGGGAACGTCTAATC  
TCTTAGATTTGCATAGTATGTCAAGACCTGGTAAGGTTCTTCGCG  
TAGCTTCGAATTAAACCACATGCTCCACCGCTTGTGCGGGCCCC  
CGTCAATTCCTTTGAGTTTCAGCCTTGCGGCCGTACTCCCCAGG  
CGGAATGCTTAATGCGTTAGCTGCAGCACTGAAGGGCGGAAAC  
CCTCCAACACTTAGCATTTCATCGTTTACGGTATGGACTACCAGG  
GTATCTAATCCTGTTTGCTACCCATACTTTGAGCCTCAGCGTCA  
GTTACAGACCAGACAGCCGCCTTCGCCACTGGTGTCTCTCCATA  
TATCTACGCATTTACCGCTACACATGGAGTTCCACTGTCTCTT  
CTGCACTCAAGTTTCCCAGTTTCCGATGCATTCTTCGGTTGAG  
CCGAAGGCTTTCACATCAGACTTAAAAAACCGCCTGCGCTCGC  
TTTACGCCCAATAAATCCGGACAACGCTTGCCACCTACGTATTA  
CCGCGGCTGCTGGCACGTAGTTAGCCGTGGCTTTCTGGTTAAAT  
ACCGTCAATACCTGAACAGTTACTCTCAGATATGTTCTTCTTTAA  
CAACAGAGTTTTACGAGCCGAAACCCTTCTTCACTACGCGGC  
GTTGCTCCATCAGACTTTCGTCCATTGTGGAAGATTCCCTACTG  
CTGCCTCCCGTAGGAGTTTGGGCCGTGTCTCAGTCCCAATGTGG  
CCGATTACCTCTCAGGTCGGCTACGTATCATTGCCATGGTGAG  
CCGTTACCCCAACCATCTAGCTAATACGCCGCGGGACCATCCAA  
AAGTGATAGCCGAAGCCATCTTCAAACCTCGGACCATGCGGTC  
CAAGTTGTTATGCGGTATTAGCATCTGTTTCCAGGTGTTATCCCC  
CGCTTCTGGGCAGGTTTCCCACGTGTTACTCACCAGTTCGCCAC  
TCACTCAAATGTAAATCATGATGCAAGCACCAATCAATACCAG  
A 3'

**LAB Isolate 3: *Lactobacillus Fusant* XU1 16S ribosomal RNA gene, partial sequence.**

5'ATGCAGTCGAACGAGTTCTCGTTGATTGCATCGGTGCTTG  
CACCGAGATTCAACATGGAACGAGTGGCGGACGGGTGAGTAA  
CACGTGGGTAACCTGCCCTTAAGTGGGGGATAACATTTGGAAA

CAGATGCTAATACCGCATAGATCCAAGAACCGCATGGTTCTTGG  
 CTGAAAGATGGCGTAAGCTATCGCTTTTGGATGGACCCGCGGC  
 GTATTGCTAGTTGGTGAGGTAATGGCTACCAAGGCGATGATAC  
 GTAGCCGAACCTGAGAGGTTGATCGGCCACATTGGGACTGAGAC  
 ACGGCCCAAACCTCCTACGGGAGGCAGCAGTAGGGAATCTTCC  
 ACAATGGACGCAAGTCTGATGGAGCAACGCCGCGTGAGTGAA  
 GAAGGCTTTCGGGTCGTAAAACCTCTGTTGTTGGAGAAGAATGG  
 TCGGCAGAGTAACTGTTGTCTGGCGTGACGGTATCCAACCAGAA  
 AGCCACGGCTAACTACGTGCCAGCAGCCGCGGTAAACGTAGGT  
 GGCAAGCGTTATCCGGATTTATTGGGCGTAAAGCGAGCGCAGG  
 CGTTTTTTAAGTCTGATGTGAAAGCCCTCGGCTTAACCGAGGA  
 AGCGCATCGGAAACTGGGAAACTTGAGTGCAGAAGAGGACAG  
 TGGAATCCATGTGTAGCGGTGAAATGCGTAGATATATGGAAG  
 AACACCAGTGGCGAAGGCGGCTGTCTGGTCTGTAACCTGACGCT  
 GAGGCTCGAAAGCATGGGTAGCGAACAGGATTAGATACCCTGG  
 TAGTCCATGCCGTAAACGATGAATGCTAGGTGTTGGAGGGTTTC  
 CGCCCTTCAGTGCCGCAGCTAACGCATTAAGCATTCCGCCTGG  
 GGAGTACGACCGCAAGGTTGAAACTCAAAGGAATTGACGGGG  
 GCCCGCACAAAGCGGTGGAGCATGTGGTTTAATTCGAAGCAACG  
 CGAAGAACCTTACCAGGTCTTGACATCTTTTGATCACCTGAGAG  
 ATCAGGTTTCCCCTTCGGGGGCAAAATGACAGGTGGTGCATGG  
 TTGTCTCAGCTCGTGTCTGTGAGATGTTGGGTAAAGTCCCGCAA  
 CGAGCGCAACCCTTATGACTAGTTGCCAGCATTTAGTTGGGCAC  
 TCTAGTAAGACTGCCGGTGACAAACCGGAGGAAGGTGGGGAT  
 GACGTCAAATCATCATGCCCCCTTATGACCTGGGCTACACACGTG  
 CTACAATGGATGGTACAACGAGTTGCGAGACCGCGAGGTCAA  
 GCTAATCTCTTAAAGCCATTCTCAGTTCGGACTGTAGGCTGCAA  
 CTCGCCTACACGAAGTCGGAATCGCTAGTAATCGCGGATCAGC  
 ACGCCGCGGTGAATACGTTCCCGGGCCTTGTACACACCGCCCG  
 TCACACCATGAGAGTTTGTAACACCCGAAGCCGGTGGCGTAAC  
 TCCTTTAGGGAGCGAGCCGTCTAAGGTGACAAATT3'

**LAB Isolate 4: *Lactobacillus reuteri* DSM 20016, 16S ribosomal RNA gene, partial sequence.**

5'AGAGTTTGATNNTGGCTCAGGATGAACGCCGGCGGTGTG  
 CCTAATACATGCAAGTCGTACGCACTGGCCCAACTGATTGATGG  
 TGCTTGACCTGATTGACGATGGATCACCAGTGAGTGGCGGAC  
 GGGTGAGTAACACGTAGGTAACCTGCCCCGAGCGGGGGATA  
 ACATTTGGAAACAGATGCTAATACCGCATAACAACAAAAGCCG  
 CATGGCTTTTGTGTTGAAAGATGGCTTTGGCTATCACTCTGGGATG  
 GACCTGCGGTGCATTAGCTAGTTGGTAAGGTAACGGCTTACCA  
 AGGCGATGATGCATAGCCGAGTTGAGAGACTGATCGGCCACAA  
 TGGAATCTTCCACAATGGGCGCAAGCCTGATGGAGCAACGCC  
 GCGTGAGTGAAGAAGGGTTTCGGCTCGTAAAGCTCTGTTGTTG  
 GAGAAGAACGTGCGTGAGAGTAACTGTTNCNCGCAGTGACGGT  
 ATCCAACCAGAAAGTCACGGCTAACTACGTGCCAGCAGCCGC  
 GGTAATACGTAGGTGGCAAGCGTTATCCGGATTTATTGGGCGTA  
 AAGCGAGCGCAGGCGGTTGCTTAGGTCTGATGTGAAAGCCTTC  
 GGCTTAACCGAAGAAGTGCATCGGAAACCGGGCGACTTGAGT  
 GCAGAAGAGGACAGTGGAATCCATGTGTAGCGGTGGAATGC  
 GTAGATATATGGAAGAACACCAAGTGGCGAAGGCGGCTGTCTGG  
 TCTGCAACTGACGCTGAGGCTCGAAAGCATGGGTAGCGAACA  
 GGATTAGATACCCTGGTAGTCCATGCCGTAAACGATGAGTGCTA  
 GGTGTTGGAGGGTTCCGCCCTTCAGTGCCGGAGCTAACGCATT  
 AAGCACTCCGCCTGGGGAGTACGACCGCAAGGTTGAAACTCA



AAGGAATTGACGGGGGCCCCGCACAAGCGGTGGAGCATGTGGT  
 TTAATTCGAAGCTACGCGAAGAACCTTACCAGGTCTTG1ACATC  
 TTGCGCTAACCTTAGAGATAAGGCGTTNCCTTCGGGGACGCAA  
 TGACAGGTGGTG1CATGGTCGTCGTCAGCTCGTGTCGTGAGATG  
 TTGGGTAAAGTCCTGCAACGAGCGCAACCCTTGTTACTAGTTGC  
 CAGCATTAAAGTTGGGCACTCTAGTGAGACTGCCGGTGACAAAC  
 CGGAGGAAGGTGGGGACGACGTCAGATCATCATGCCCCCTTATG  
 ACCTGGGCTACACACGTGCTACAATGGACGGTACAACGAGTCG  
 CAAGCTCGCGAGATAAGCTAATCTCTTAAAGCCGTTCTCAGTTC  
 GGACTGTAGGCTGCAACTCGCCTACACGAAGTCGGAATCGCTA  
 GTAATCGCGGATCAGCATGCCGCGGTGAATACGTTCCCGGGCC  
 TTGTACACACCGCCCCGTACACCATGGGAGTTTGTAACGCCCA  
 AAGTCGGTGGCCTAACCTTTATGGAGGGAGCCGCCTAAGGCGG  
 GACAGATGACTGGGGTGAAGTCGTAACAAGGTAGCCGTAGGA  
 GAGCCTGCGGCTGGATCACCTCCTTTNT3'

**LAB Isolate 5: *Lactobacillus kunkeei* strain H14\_2\_1 BCO2 16S ribosomal RNA gene, partial sequence.**

5'GACGAGCTCTCCTGAATTGATTTTATGCTTGCATAAATGAT  
 TTTTAGATTTCGGAGCGAGTGGCGAACTGGTGAGTAACACGTGG  
 GTAACCTGCCCCGAAGCGGGGGATAACATTTGGAAACAAATGC  
 TAATACCGCATAATTAGGTGGAACCGCATGGTTCCAACCTGAAA  
 GATGGCTCTGCTATCACTTTGGGATGGACCCGCGCCGTATTAGT  
 TAGTTGGTGAGATAAAAGCCACCAAGACCATGATACGTAGCC  
 GACCTGAGAGGGTAATCGGCCACATTGGGACTGAGACACGGC  
 CCAGACTCCTACGGGAGGCAGCAGTAGGGAATCTTCCACAATG  
 GACGAAAGTCTGATGGAGCAACGCCGCGTGAGTGATGAAGGT  
 TTTCGGATCGTAAAACTCTGTTGTAAAGAAGAACAAGTGTTAG  
 AGTAACTGTAAACACTTTGACGGTATTTAACCAGAAAGCCACG  
 GCTAACTACGTGCCAGCAGCCGCGGTAATACGTAGGTGGCAAG  
 CGTTGTCCGATTTATTGGGCGTAAAGCGAGCGCAGGCGGATTT  
 GTAAGTCTGCTGTGAAAGCCCTCAGCTCAACTGAGGAAGTGCA  
 GTGGAAACTACAAAACCTGAGTACAGAAGAGGAAAGTGGAAC  
 TCCATGTGTAGCGGTGAAATGCGTAGATATATGGAAGAACACC  
 AGTGCGGAAGGCGGCTTTCTGGTCTGTTACTGACGCTGAGGCT  
 CGAAAGCATGGGTAGCGAACAGGATTAGATACCCTGGTAGTCC  
 ATGCCGTAAACGATGAATACTAGGTGTTGGAGGGTTTCCGCCCT  
 TCACTGCCGCAGCTAACGCATTAAGTATTCCGCCTGGGGAGTAC  
 GACCGCAAGGTTGAAACTCAAAGGAATTGACGGGGGCCCCGCA  
 CAAGTGGTGGAGCATGTGGTTTAATTCGATGCTACGCGAAGAA  
 CTTACCAGCTCTTGACATCTTCTGCCAACCCAAGAGATTGGGC  
 GTTCCCTTCGGGGACAGAATGACAGGTGGTGCATGGTTGTCGT  
 CAGCTCGTGTCGTGAGATGTTGGGTAAAGTCCCGCAACGAGCG  
 CAACCCTTATTATTAGTTGCCAGCATTTAGTTGGGCACTCTAGTG  
 AGACTGCCGGTGATAAACCGGAGGAAGGTGGGGACGACGTCA  
 AATCATCATGCCCCCTTATGAGCTGGGCTACACACGTGCTACAAT  
 GGATGGTACAACGAGTCGCGAAACCGCGAGGTCAAGCTAATCT  
 CTTAAAGCCATTCTCAGTTCGGATTGCAGGCTGCAACTCGCCTG  
 CATGAAGTTGGAATCACTAGTAATCGTGGATCAGCATGCCACG  
 GTGAATACGTTCCCGGGCCTTGTAACACACCGCCCGTCACACCAT  
 GAGAGTTTGTAACACCCAAAGACGATGGGGTAA3'

**AAB Isolate 1: *Acetobacter aceti* strain W1 16S ribosomal RNA gene, partial sequence.**

5'AGAGTTTGATTCTGGCTCAGAGCGAACGCTGGCGGCATG  
 CTTAACACATGCAAGTCGCACGAAGGCTTCGGCCTTAGTGGCG  
 GACGGGTGAGTAACGCGTAGGAATCTATCCATGGGTGGGGGAT

AACTCCGGGAAGTGGAGCTAATACCGCATGATACCTGAGGGTC  
AAAGGCGCAAGTCGCCTGTGGAGGAGTCTGCGTTTGATTAGCT  
TGTTGGTGGGGTAAAGGCCTACCAAGGCGATGATCAATAGCTG  
GTCTGAGAGGATGATCAGCCACACTGGGACTGAGACACGGCC  
CAGACTCCTACGGGAGGCAGCAGTGGGGAATATTGGACAATGG  
GGGCAACCCTGATCCAGCAATGCCGCGTGTGTGAAGAAGGTTT  
TCGGATTGTAAAGCACTTTCGGCGGGGACGATGATGACGGTAC  
CCGCAGAAGAAGCCCCGGCTAACTTCGTGCCAGCAGCCGCGG  
TAATACGAAGGGGGCTAGCGTTGCTCGGAATGACTGGGCGTAA  
AGGGCGTGTAGGCGGTTTGTACAGTCAGATGTGAAATCCCCGG  
GCTTAACCTGGGAGCTGCATTTGATACGTGCAGACTAGAGTATG  
AGAGAGGGTTGTGGAATTCTCAGTGTAGAGGTGAAATTCGTAG  
ATATTGGGAAGAACACCGGTGGCGAAGGCGGCAACCTGGCTC  
ATTACTGACGCTGAGGCGCGAAAGCGTGGGGAGCAAACAGGA  
TTAGATACCCTGGTAGTCCACGCTGTAAACGATGTGTGCTGGAT  
GTTGGGTAACTTAGTTACTCAGTGTCTAGCTAACGCGATAAGC  
ACACCGCCTGGGGAGTACGGCCGCAAGGTTGAAACTCAAAGG  
AATTGACGGGGGCCCCGCACAAGCGGTGGAGCATGTGGTTTAAT  
TCGAAGCAACGCGCAGAACCTTACCAGGGCTTGTATGGAGAG  
GCTGTATTCAGAGATGGATATTTCCCGCAAGGGACCTCTTGAC  
AGGTGCTGCATGGCTGTCTCAGCTCGTGTCTGTGAGATGTTGG  
TTAAGTCCCGCAACGAGCGCAACCCTTATCTTTAGTTGCCAGCA  
TGTTTGGGTGGGCACTCTAAAGAGACTGCCGGTGACAAGCCGG  
AGGAAGGTGGGGATGACGTCAAGTCCTCATGGCCCTTATGTCC  
TGGGCTACACACGTGCTACAATGGCGGTGACAGTGGGAAGCTA  
GATGGCGACATCGTGCCGATCTCTAAAAACCGTCTCAGTTCGG  
ATTGCACTCTGCAACTCGAGTGCATGAAGGTGGAATCGCTAGT  
AATCGCGGATCAGCATGCCGCGGTGAATACGTTCCCGGGCCTT  
GTACACACCGCCCGTCACACCATGGGAGTTGGTTTGACCTTAA  
GCCGGTGAGCGAACCGCAAGGACGCAGCCGACCACGGTCGGG  
TCAGCGACTGGGGTGAAGTCGTAACAAGGTAGCC3'

**AAB Isolate 2: *Acetobacter lovaniensis* strain NBRC 13753 16S ribosomal RNA, partial sequence.**

5'TGAGTTTTGATCCTGGCTCAGAGCGAACGCTGGCGGCAT  
GCTTAACACATGCAAGTCGCACGAACCTTTCGGGGTTAGTGGC  
GGACGGGTGAGTAACGCGTAGGAATCTGTCCACGGGTGGGGG  
ATAACTCTGGGAAACTGGAGCTAATACCGCATGATACCTGAGG  
GTCAAAGGCGCAAGTCGCCTGTGGAGGAGCCTGCGTTCGATTA  
GCTAGTTGGTGGGGTAAAGGCCTACCAAGGCGATGATCGATAG  
CTGGTTTGAGAGGATGATCAGCCACACTGGGACTGAGACACGG  
CCCAGACTCCTACGGGAGGCAGCAGTGGGGAATATTGGACAAT  
GGGGGCAACCCTGATCCAGCAATGCCGCGTGTGTGAAGAAGG  
TCTTCGGATTGTAAAGCACTTTCGACGGGGACGATGATGACGG  
TACCCGTAGAAGAAGCCCCGGCTAACTTCGTGCCAGCAGCCGC  
GGTAATACGAAGGGGGCTAGCGTTGCTCGGAATGACTGGGCGT  
AAAGGGCGTGTAGGCGGTTTACACAGTCAGATGTGAAATCCCC  
GGGCTTAACCTGGGAGCTGCATTTGATACGTGTAGACTAGAGTG  
TGAGAGAGGGTTGTGGAATTCCCAGTGTAGAGGTGAAATTCGT  
AGATATTGGGAAGAACACCGGTGGCGAAGGCGGCAACCTGGC  
TCATGACTGACGCTGAGGCGCGAAAGCGTGGGGAGCAAACAG  
GATTAGATACCCTGGTAGTCCACGCTGTAAACGATGTGTGCTAG  
ATGTTGGGTAACTTTGTTATTCAGTGTCTCAGTTAACGCGTTAA  
GCACACCGCCTGGGGAGTACGGCCGCAAGGTTGAAACTCAA  
GGAATTGACGGGGGCCCCGCACAAGCGGTGGAGCATGTGGTTTA  
ATTCGAAGCAACGCGCAGAACCTTACCAGGGCTTGAATGTAGA

GGCTGTATTCAGAGATGGATATTTCCCGCAAGGGACCTCTAACA  
 CAGGTGCTGCATGGCTGTCGTCAGCTCGTGTCTGAGATGTTGG  
 GTTAAGTCCCGCAACGAGCGCAACCCCTATCTTTAGTTGCCAGC  
 ATGTTTGGGTGGGCACTCTAGAGAGACTGCCGGTGACAAGCCG  
 GAGGAAGGTGGGGATGACGTCAAGTCCTCATGGCCCTTATGTC  
 CTGGGCTACACACGTGCTACAATGGCGGTGACAGTGGGAAGCT  
 AGATGGTGACATCATGCTGATCTCTAAAAGCCGTCTCAGTTCGG  
 ATTGCACTCTGCAACTCGAGTGCATGAAGGTGGAATCGCTAGT  
 AATCGCGGATCAGCATGCCGCGGTGAATACGTTCCCGGGCCTT  
 GTACACACCGCCCGTCACACCATGGGAGTTGGTTTGACCTTAA  
 GCCGGTGAGCGAACCCGCAAGGGGCGCAGCCGACCACGGTCG  
 GGTCCAGCGACTGGGGTGAAGTCGTAC3'

**AAB Isolate 3: *Acetobacter pasteurianus* strain bh12 16S ribosomal RNA gene, partial sequence.**

5'CCAATGGCGGCAGCTTACACATGCAGTCGCACGAAGGTT  
 TCGGCCTTAGTGGCGGACGGGTGAGTAACGCGTAGGTATCTATC  
 CATGGGTGGGGGATAACACTGGGAACTGGTGCTAATACCGCA  
 TGACACCTGAGGGTCAAAGGCGCAAGTCGCCTGTGGAGGAGC  
 CTGCGTTTGATTAGCTAGTTGGTGGGGTAAAGGCCTACCAAGGC  
 GATGATCAATAGCTGGTTTGAGAGGATGATCAGCCACACTGGG  
 ACTGAGACACGGCCCAGACTCCTACGGGAGGCAGCAGTGGGG  
 AATATTGGACAATGGGGGCAACCCTGATCCAGCAATGCCGCGT  
 GTGTGAAGAAGGTCTTCGGATTGTAAAGCACTTTCGACGGGGA  
 CGATGATGACGGTACCCGTAGAAGAAGCCCCGGCTAACTTCGT  
 GCCAGCAGCCGCGGTAATACGAAGGGGGCTAGCGTTGCTCGG  
 AATGACTGGGCGTAAAGGGCGTGTAGGCGGTTTGTACAGTCAG  
 ATGTGAAATCCCCGGGCTTAACCTGGGAGCTGCATTTGATACGT  
 GCAGACTAGAGTGTGAGAGAGGGTTGTGGAATTCCCAGTGTAG  
 AGGTGAAATTTCGTAGATATTGGGAAGAACACCGGTGGCGAAG  
 GCGGCAACCTGGCTCATTACTGACGCTGAGGCGCGAAAGCGTG  
 GGGAGCGGACAGGATTAGATACCCTGGTAGTCCACGCTGTAAA  
 CGATGTGTGCTAGATGTTGGGTGACTTAGTCATTAGTGTGCGCA  
 GTTAACGCGTTAAGCACACCGCCTGGGGAGTACGGGGCCGCGA  
 GGTTGAAACTCAAAGGAATTGACGGGGGGCGCCGCACAAGCG  
 GTGGAGCATGTGGTTGAATTCGAAAGCAACGCGCAGAACCTTA  
 CCACGGCTTGGAGTGTAGAGGCTGCAAGCAGAGATGTTTGTTT  
 CCCGCAAGGGACCTCTAACACAGGTGCTGGCGTGGCTGTCTGTC  
 AGCTCGTGTCTGAGATGTTGGGTAAAGTCCCTCAGCGAGCGC  
 AACCCGCTATCTTTAGTTGCCATCAAGTTTGGCCTGGGCACTCT  
 AGGAGAGACTGCCAGGTGACCGAGCCCCGCACAAGGTGGGAG  
 AATGACGTGAAGTCCTCATGGCCGCTTAAGGGTGGCGTGGGAC  
 ACGTGCTACAATGGCGGTGACAGTGGGAAGCTAGGTGGTGAC  
 ACCATGCTGATCTCTAAAAGCCGTCTCAGTTTCGGATTGCACTCT  
 GCAACTCGAGTGCATGAAGGTGGAATCGCTAGTAATCGCGGAT  
 CAGCATGCCGCGGTGAATACGTTCCCGGGCCTTGTACACACCG  
 CCCGTCACACCATGGGAGTTGGTTTGACCTTAAGCCGGTGAGC  
 GAACCGCAAGGACGCAGCCGACCACGTCGTACGCGT3'
